# Supplementary material for: Occupational Road Safety Management: A Preliminary Insight for a Landfill Remediation Site
Source: MDPI journal article supplement (doi:10.3390/buildings13051238), 2023-05-09
Supplement: s1 [file s1]

K-MEANS clustering – solution with 3 centroids

| Initial centroids |         |   |   |
|-------------------|---------|---|---|
|                   | Cluster |   |   |
|                   | 1       | 2 | 3 |
| D1                | 1       | 0 | 1 |
| D2                | 1       | 0 | 0 |
| D3                | 0       | 0 | 1 |
| D4                | 0       | 1 | 0 |

| Final centroids |          |   |   |
|-----------------|----------|---|---|
|                 | Clusters |   |   |
|                 | 1        | 2 | 3 |
| D1              | 1        | 0 | 0 |
| D2              | 1        | 0 | 0 |
| D3              | 0        | 0 | 1 |
| D4              | 0        | 1 | 0 |

| Iterations                                                     |                      |      |      |
|----------------------------------------------------------------|----------------------|------|------|
| Iteration                                                      | Changes in centroids |      |      |
|                                                                | 1                    | 2    | 3    |
| 1                                                              | ,454                 | ,125 | ,948 |
| 2                                                              | ,033                 | ,027 | ,022 |
| 3                                                              | ,000                 | ,000 | ,000 |
| Last iteration: n.3. Minimum distance among centroids = 1,414. |                      |      |      |

| Distances among final centroids |       |       |       |
|---------------------------------|-------|-------|-------|
| Cluster                         | 1     | 2     | 3     |
| 1                               |       | 1,296 | 1,389 |
| 2                               | 1,296 |       | 1,346 |
| 3                               | 1,389 | 1,346 |       |

| Distribution of events in each cluster |   |     |
|----------------------------------------|---|-----|
| Cluster                                | 1 | 40  |
|                                        | 2 | 49  |
|                                        | 3 | 77  |
| Valid values                           |   | 166 |
| Missing values                         |   | 0   |

| Data clustering |         |          |
|-----------------|---------|----------|
| Accident code   | Cluster | Distance |
| 5219939         | 1       | ,453     |
| 5227991         | 2       | ,926     |
| 5233706         | 3       | ,961     |
| 5239917         | 2       | ,144     |
| 5254605         | 2       | ,144     |
| 5257403         | 1       | ,453     |
| 5260843         | 2       | ,144     |
| 5261118         | 3       | ,961     |
| 5280312         | 1       | ,453     |
| 5308022         | 3       | ,041     |
| 5359460         | 3       | ,041     |
| 5378910         | 3       | ,988     |
| 5394558         | 1       | ,637     |
| 5403597         | 3       | ,041     |
| 5416898         | 3       | ,041     |
| 5417846         | 1       | ,637     |
| 5428959         | 3       | ,041     |
| 5456762         | 3       | ,041     |
| 5473077         | 2       | ,144     |
| 5481687         | 3       | ,041     |
| 5512971         | 2       | ,926     |
| 5514923         | 1       | ,898     |
| 5519303         | 3       | ,041     |
| 5523204         | 3       | ,041     |
| 5544853         | 3       | ,041     |
| 5568913         | 3       | ,041     |
| 5587154         | 3       | ,041     |
| 5605881         | 3       | ,041     |
| 5609072         | 3       | ,041     |
| 5627224         | 1       | ,637     |
| 5658559         | 2       | 1,302    |
| 5689032         | 2       | ,144     |
| 5702914         | 2       | ,144     |
| 5708917         | 3       | ,041     |
| 5717895         | 1       | ,453     |
| 5723126         | 1       | ,453     |

|         |   |       |
|---------|---|-------|
| 5743408 | 3 | ,041  |
| 5752074 | 3 | ,041  |
| 5755027 | 1 | ,637  |
| 4739188 | 1 | 1,027 |
| 4776570 | 2 | ,904  |
| 4827243 | 3 | ,041  |
| 4840851 | 3 | ,041  |
| 4951411 | 3 | ,041  |
| 4963029 | 2 | ,144  |
| 4979023 | 3 | ,041  |
| 4986025 | 2 | ,144  |
| 4999394 | 2 | ,144  |
| 4999437 | 3 | ,041  |
| 4999779 | 2 | ,926  |
| 5005113 | 2 | ,144  |
| 5005899 | 2 | ,144  |
| 5029586 | 2 | ,144  |
| 5044215 | 3 | ,041  |
| 5044491 | 2 | ,144  |
| 5069991 | 1 | ,637  |
| 5109421 | 3 | ,041  |
| 5151475 | 3 | ,041  |
| 5190445 | 1 | ,453  |
| 5196809 | 2 | ,904  |
| 4162463 | 3 | ,041  |
| 4167309 | 2 | ,904  |
| 4168594 | 3 | ,041  |
| 4180848 | 2 | ,904  |
| 4234293 | 2 | ,144  |
| 4246090 | 3 | ,041  |
| 4255807 | 3 | ,041  |
| 4271650 | 2 | ,144  |
| 4293580 | 1 | ,453  |
| 4295226 | 3 | ,041  |
| 4321903 | 3 | ,041  |
| 4321903 | 3 | ,041  |
| 4358573 | 1 | ,453  |
| 4360833 | 3 | ,041  |

|         |   |       |
|---------|---|-------|
| 4363365 | 2 | ,144  |
| 4408097 | 3 | ,041  |
| 4419919 | 3 | ,041  |
| 4435262 | 2 | ,144  |
| 4475477 | 3 | ,041  |
| 4489977 | 2 | ,144  |
| 4493764 | 3 | ,041  |
| 4531051 | 1 | ,637  |
| 4601598 | 3 | ,041  |
| 4628041 | 2 | ,144  |
| 4629696 | 3 | ,041  |
| 4652214 | 1 | ,637  |
| 4655205 | 3 | ,041  |
| 4662933 | 2 | ,948  |
| 4686843 | 3 | ,041  |
| 4687998 | 1 | ,637  |
| 4697683 | 3 | ,041  |
| 3632915 | 1 | ,898  |
| 3666152 | 1 | ,453  |
| 3666869 | 1 | ,637  |
| 3684188 | 1 | 1,027 |
| 3689046 | 1 | ,453  |
| 3704802 | 2 | ,144  |
| 3715452 | 1 | 1,027 |
| 3719481 | 3 | ,041  |
| 3721356 | 3 | ,041  |
| 3757503 | 1 | ,637  |
| 3762778 | 3 | ,041  |
| 3777515 | 2 | ,144  |
| 3777525 | 2 | ,144  |
| 3782633 | 3 | ,041  |
| 3793888 | 3 | ,041  |
| 3803506 | 2 | ,144  |
| 3805722 | 1 | ,637  |
| 3808337 | 1 | ,637  |
| 3824879 | 1 | ,637  |
| 3846932 | 1 | ,898  |
| 3867080 | 2 | ,144  |

|         |   |      |
|---------|---|------|
| 3879665 | 3 | ,041 |
| 3890568 | 2 | ,144 |
| 3903958 | 2 | ,144 |
| 3974131 | 3 | ,041 |
| 3987602 | 3 | ,041 |
| 4021663 | 3 | ,041 |
| 4022125 | 1 | ,453 |
| 4039669 | 2 | ,144 |
| 4061456 | 1 | ,453 |
| 4077421 | 2 | ,144 |
| 4081552 | 1 | ,898 |
| 4096596 | 1 | ,637 |
| 4100323 | 3 | ,041 |
| 4101461 | 2 | ,948 |
| 4109205 | 1 | ,637 |
| 4111072 | 2 | ,144 |
| 4133804 | 3 | ,041 |
| 4134516 | 1 | ,637 |
| 4158340 | 2 | ,926 |
| 3130668 | 3 | ,041 |
| 3147874 | 1 | ,453 |
| 3147909 | 2 | ,144 |
| 3151192 | 2 | ,144 |
| 3179134 | 3 | ,041 |
| 3182209 | 2 | ,144 |
| 3204696 | 2 | ,144 |
| 3215535 | 3 | ,041 |
| 3219461 | 3 | ,041 |
| 3256654 | 3 | ,041 |
| 3295676 | 2 | ,144 |
| 3318142 | 3 | ,041 |
| 3319296 | 3 | ,041 |
| 3319313 | 3 | ,041 |
| 3320645 | 1 | ,898 |
| 3348705 | 3 | ,041 |
| 3359404 | 1 | ,898 |
| 3388179 | 1 | ,898 |
| 3391823 | 3 | ,041 |

|         |   |      |
|---------|---|------|
| 3417209 | 3 | ,041 |
| 3418750 | 3 | ,041 |
| 3419407 | 2 | ,144 |
| 3442738 | 3 | ,041 |
| 3454027 | 2 | ,144 |
| 3457245 | 2 | ,144 |
| 3461600 | 3 | ,041 |
| 3475945 | 1 | ,898 |
| 3508834 | 2 | ,144 |
| 3520037 | 3 | ,041 |
| 3523516 | 3 | ,041 |
| 3556665 | 3 | ,041 |
| 3575318 | 3 | ,961 |
| 3607483 | 3 | ,041 |
| 3610430 | 3 | ,041 |
| 3611638 | 3 | ,041 |
