# Supplementary material for: Occupational Road Safety Management: A Preliminary Insight for a Landfill Remediation Site
Source: MDPI journal article supplement (doi:10.3390/buildings13051238), 2023-05-09
Supplement: s1 [file s1]

K-MEANS clustering – solution with 4 centroids

| Initial centroids |   |   |   |   | Final centroids |   |   |   |   |
|-------------------|---|---|---|---|-----------------|---|---|---|---|
| Cluster           |   |   |   |   | Cluster         |   |   |   |   |
|                   | 1 | 2 | 3 | 4 |                 | 1 | 2 | 3 | 4 |
| D1                | 1 | 0 | 1 | 0 | D1              | 1 | 0 | 1 | 0 |
| D2                | 1 | 1 | 0 | 0 | D2              | 1 | 0 | 0 | 0 |
| D3                | 0 | 1 | 1 | 0 | D3              | 0 | 1 | 1 | 0 |
| D4                | 0 | 0 | 0 | 1 | D4              | 0 | 0 | 0 | 1 |

| Chronology of iterations |      |      |      |      |
|--------------------------|------|------|------|------|
| Changes in centroids     |      |      |      |      |
| Iteration                | 1    | 2    | 3    | 4    |
| 1                        | ,453 | ,986 | ,250 | ,125 |
| 2                        | ,000 | ,000 | ,000 | ,000 |

Last iteration: n.2. Minimum distance among initial centroids = 1,414.

| Distances among final centroids |       |       |       |       | Events in each cluster |     |
|---------------------------------|-------|-------|-------|-------|------------------------|-----|
| Cluster                         | 1     | 2     | 3     | 4     | Cluster                |     |
| 1                               |       | 1,411 | 1,196 | 1,306 | 1                      | 40  |
| 2                               | 1,411 |       | 1,031 | 1,359 | 2                      | 74  |
| 3                               | 1,196 | 1,031 |       | 1,526 | 3                      | 4   |
| 4                               | 1,306 | 1,359 | 1,526 |       | 4                      | 48  |
|                                 |       |       |       |       | Valid values           | 166 |
|                                 |       |       |       |       | Missing values         | 0   |

| Data clustering |         |          |
|-----------------|---------|----------|
| Accident code   | Cluster | Distance |
| 5219939         | 1       | ,453     |
| 5227991         | 4       | ,921     |
| 5233706         | 3       | ,250     |
| 5239917         | 4       | ,125     |
| 5254605         | 4       | ,125     |
| 5257403         | 1       | ,453     |
| 5260843         | 4       | ,125     |
| 5261118         | 3       | ,250     |
| 5280312         | 1       | ,453     |
| 5308022         | 2       | ,014     |
| 5359460         | 2       | ,014     |
| 5378910         | 2       | ,986     |
| 5394558         | 1       | ,637     |
| 5403597         | 2       | ,014     |
| 5416898         | 2       | ,014     |
| 5417846         | 1       | ,637     |
| 5428959         | 2       | ,014     |
| 5456762         | 2       | ,014     |
| 5473077         | 4       | ,125     |
| 5481687         | 2       | ,014     |
| 5512971         | 4       | ,921     |
| 5514923         | 1       | ,898     |
| 5519303         | 2       | ,014     |
| 5523204         | 2       | ,014     |
| 5544853         | 2       | ,014     |
| 5568913         | 2       | ,014     |
| 5587154         | 2       | ,014     |
| 5605881         | 2       | ,014     |
| 5609072         | 2       | ,014     |
| 5627224         | 1       | ,637     |
| 5658559         | 3       | ,750     |
| 5689032         | 4       | ,125     |
| 5702914         | 4       | ,125     |
| 5708917         | 2       | ,014     |
| 5717895         | 1       | ,453     |
| 5723126         | 1       | ,453     |

|         |   |       |
|---------|---|-------|
| 5743408 | 2 | ,014  |
| 5752074 | 2 | ,014  |
| 5755027 | 1 | ,637  |
| 4739188 | 1 | 1,027 |
| 4776570 | 4 | ,921  |
| 4827243 | 2 | ,014  |
| 4840851 | 2 | ,014  |
| 4951411 | 2 | ,014  |
| 4963029 | 4 | ,125  |
| 4979023 | 2 | ,014  |
| 4986025 | 4 | ,125  |
| 4999394 | 4 | ,125  |
| 4999437 | 2 | ,014  |
| 4999779 | 4 | ,921  |
| 5005113 | 4 | ,125  |
| 5005899 | 4 | ,125  |
| 5029586 | 4 | ,125  |
| 5044215 | 2 | ,014  |
| 5044491 | 4 | ,125  |
| 5069991 | 1 | ,637  |
| 5109421 | 2 | ,014  |
| 5151475 | 2 | ,014  |
| 5190445 | 1 | ,453  |
| 5196809 | 4 | ,921  |
| 4162463 | 2 | ,014  |
| 4167309 | 4 | ,921  |
| 4168594 | 2 | ,014  |
| 4180848 | 4 | ,921  |
| 4234293 | 4 | ,125  |
| 4246090 | 2 | ,014  |
| 4255807 | 2 | ,014  |
| 4271650 | 4 | ,125  |
| 4293580 | 1 | ,453  |
| 4295226 | 2 | ,014  |
| 4321903 | 2 | ,014  |
| 4321903 | 2 | ,014  |
| 4358573 | 1 | ,453  |
| 4360833 | 2 | ,014  |

|         |   |       |
|---------|---|-------|
| 4363365 | 4 | ,125  |
| 4408097 | 2 | ,014  |
| 4419919 | 2 | ,014  |
| 4435262 | 4 | ,125  |
| 4475477 | 2 | ,014  |
| 4489977 | 4 | ,125  |
| 4493764 | 2 | ,014  |
| 4531051 | 1 | ,637  |
| 4601598 | 2 | ,014  |
| 4628041 | 4 | ,125  |
| 4629696 | 2 | ,014  |
| 4652214 | 1 | ,637  |
| 4655205 | 2 | ,014  |
| 4662933 | 4 | ,966  |
| 4686843 | 2 | ,014  |
| 4687998 | 1 | ,637  |
| 4697683 | 2 | ,014  |
| 3632915 | 1 | ,898  |
| 3666152 | 1 | ,453  |
| 3666869 | 1 | ,637  |
| 3684188 | 1 | 1,027 |
| 3689046 | 1 | ,453  |
| 3704802 | 4 | ,125  |
| 3715452 | 1 | 1,027 |
| 3719481 | 2 | ,014  |
| 3721356 | 2 | ,014  |
| 3757503 | 1 | ,637  |
| 3762778 | 2 | ,014  |
| 3777515 | 4 | ,125  |
| 3777525 | 4 | ,125  |
| 3782633 | 2 | ,014  |
| 3793888 | 2 | ,014  |
| 3803506 | 4 | ,125  |
| 3805722 | 1 | ,637  |
| 3808337 | 1 | ,637  |
| 3824879 | 1 | ,637  |
| 3846932 | 1 | ,898  |
| 3867080 | 4 | ,125  |

|         |   |      |
|---------|---|------|
| 3879665 | 2 | ,014 |
| 3890568 | 4 | ,125 |
| 3903958 | 4 | ,125 |
| 3974131 | 2 | ,014 |
| 3987602 | 2 | ,014 |
| 4021663 | 2 | ,014 |
| 4022125 | 1 | ,453 |
| 4039669 | 4 | ,125 |
| 4061456 | 1 | ,453 |
| 4077421 | 4 | ,125 |
| 4081552 | 1 | ,898 |
| 4096596 | 1 | ,637 |
| 4100323 | 2 | ,014 |
| 4101461 | 4 | ,966 |
| 4109205 | 1 | ,637 |
| 4111072 | 4 | ,125 |
| 4133804 | 2 | ,014 |
| 4134516 | 1 | ,637 |
| 4158340 | 4 | ,921 |
| 3130668 | 2 | ,014 |
| 3147874 | 1 | ,453 |
| 3147909 | 4 | ,125 |
| 3151192 | 4 | ,125 |
| 3179134 | 2 | ,014 |
| 3182209 | 4 | ,125 |
| 3204696 | 4 | ,125 |
| 3215535 | 2 | ,014 |
| 3219461 | 2 | ,014 |
| 3256654 | 2 | ,014 |
| 3295676 | 4 | ,125 |
| 3318142 | 2 | ,014 |
| 3319296 | 2 | ,014 |
| 3319313 | 2 | ,014 |
| 3320645 | 1 | ,898 |
| 3348705 | 2 | ,014 |
| 3359404 | 1 | ,898 |
| 3388179 | 1 | ,898 |
| 3391823 | 2 | ,014 |

|         |   |      |
|---------|---|------|
| 3417209 | 2 | ,014 |
| 3418750 | 2 | ,014 |
| 3419407 | 4 | ,125 |
| 3442738 | 2 | ,014 |
| 3454027 | 4 | ,125 |
| 3457245 | 4 | ,125 |
| 3461600 | 2 | ,014 |
| 3475945 | 1 | ,898 |
| 3508834 | 4 | ,125 |
| 3520037 | 2 | ,014 |
| 3523516 | 2 | ,014 |
| 3556665 | 2 | ,014 |
| 3575318 | 3 | ,250 |
| 3607483 | 2 | ,014 |
| 3610430 | 2 | ,014 |
| 3611638 | 2 | ,014 |
